# Supplementary material
Source: publisher figshare collection journal article supplement (https://tandf.figshare.com/ndownloader/files/22369500)
Supplement: Supplementary file 1 [file 22369500]

**Supplementary Information**

Transition metal complexes of novel binuclear Schiff base derived from 3,3’‑diaminobenzidine: Synthesis, characterization, thermal behavior, DFT, antimicrobial and molecular docking studies

VENKITTAPURAM PALANISWAMY RADHA, SUBRAMANIAN CHITRA, SUYAMBULINGAM JONEKIRUBAVATHI, ILL-MIN CHUNG, SEUNG-HYUN KIM and MAYAKRISHNAN PRABAKARAN*

Table S1. The different geometric parameters (bond angles, bond lengths and torsion angles) of Schiff base ligand (L) and Zn(II) complex.

| Bond length (Å) | Ligand (L) | [ZnL(Cl2)2] |
| --- | --- | --- |
| C(3) – N(9) | 1.40469 | 1.40273 |
| C(4) – N(10) | 1.40775 | 1.40456 |
| C(9) – N(1) | 1.40395 | 1.40456 |
| C(10) – N(2) | 1.41172 | 1.40273 |
| C(21) – N(9) | 1.27720 | 1.31061 |
| C(22) – N(10) | 1.27858 | 1.31107 |
| C(14) – N(2) | 1.27856 | 1.31061 |
| C(13) – N(1) | 1.28044 | 1.31106 |
| C(21) – N(12) | 1.37499 | 1.38104 |
| C(22) – N(14) | 1.38027 | 1.38069 |
| C(14) – N(6) | 1.36844 | 1.38104 |
| C(13) – N(4) | 1.37407 | 1.38070 |
| C(24) – N(13) | 1.27652 | 1.35636 |
| C(26) – N(16) | 1.28576 | 1.35609 |
| C(16) – N(5) | 1.27894 | 1.35610 |
| C(18) – N(8) | 1.27511 | 1.35636 |
| N(12) – C(24) | 1.40909 | 1.34357 |
| N(14) – C(26) | 1.39686 | 1.34424 |
| N(6) – C(18) | 1.40139 | 1.34357 |
| N(4) – C(16) | 1.40072 | 1.34423 |
| M(1) – N(9) | - | 2.16293 |
| M(1) – N(10) | - | 2.16248 |
| M(2) – N(1) | - | 2.16245 |
| M(2) – N(2) | - | 2.16292 |
| M(1) – Cl(3) | - | 2.32865 |
| M(1) – Cl(4) | - | 2.34034 |
| M(2) – Cl(1) | - | 2.32875 |
| M(2) – Cl(2) | - | 2.34023 |

Table S1. Continued

| Bond angles (°) | Ligand (L) | [ZnL(Cl2)2] |
| --- | --- | --- |
| C(4) – N(10) – C(22) | 128.299 | 129.245 |
| C(3) – N(9) – C(21) | 126.359 | 129.576 |
| C(10) – N(2) – C(14) | 121.750 | 129.574 |
| C(9) – N(1) – C(13) | 127.282 | 129.250 |
| N(1) – C(13) – N(4) | 132.219 | 119.343 |
| N(2) – C(14) – N(6) | 123.616 | 119.370 |
| N(10) – C(22) – N(14) | 131.695 | 119.345 |
| N(9) – C(21) – N(12) | 122.023 | 119.370 |
| N(12) – C(24) – N(13) | 129.594 | 121.795 |
| N(14) – C(26) – N(16) | 120.988 | 121.792 |
| N(6) – C(18) – N(8) | 121.571 | 121.794 |
| N(4) – C(16) – N(5) | 121.410 | 121.793 |
| N(1) – C(9) – C(10) | 127.784 | 115.480 |
| N(2) – C(10) – C(9) | 120.809 | 115.596 |
| N(9) – C(3) – C(4) | 119.742 | 115.594 |
| N(10) – C(4) – C(3) | 127.805 | 115.482 |
| C(23) – N(11) – C(27) | 121.930 | 124.169 |
| C(25) – N(15) – C(28) | 120.813 | 124.259 |
| C(17) – N(7) – C(20) | 120.079 | 124.167 |
| C(15) – N(3) – C(19) | 120.731 | 124.260 |
| N(9) – M(1) – N(10) | - | 75.684 |
| N(1) – M(2) – N(2) | - | 75.685 |
| N(2) – M(2) – Cl(2) | - | 109.436 |
| N(1) – M(2) – Cl(1) | - | 112.575 |
| Cl(2) – M(2) – Cl(1) | - | 128.334 |
| N(10) – M(1) – Cl(3) | - | 112.604 |
| N(9) – M(1) – Cl(4) | - | 109.404 |
| Cl(3) – M(1) – Cl(4) | - | 128.333 |

Table S1. Continued

| Torsion angles(°) | Ligand (L) | [ZnL(Cl2)2] |
| --- | --- | --- |
| N(4) – C(13) – N(1) – M(2) | - | -9.868 |
| N(6) – C(14) – N(2) – M(2) | - | -3.172 |
| N(12) – C(21) – N(9) – M(1) | - | -3.099 |
| N(14) – C(22) – N(10) – M(1) | - | -9.919 |
| N(10) – C(4) – C(3) – N(9) | 9.659 | 1.097 |
| N(2) – C(10) – C(9) – N(1) | -5.185 | 1.095 |
| N(16) – C(26) – N(15) – C(28) | 9.774 | -4.680 |
| N(13) – C(24) – N(11) – C(27) | 15.996 | -3.839 |
| N(8) – C(18) – N(7) – C(20) | -19.895 | -3.899 |
| N(5) – C(16) – N(3) – C(19) | -13.766 | -4.670 |
| C(4) – N(10) – M(1) – N(9) | - | 1.159 |
| C(10) – N(2) – M(2) – N(1) | - | -0.545 |
| C(3) – N(9) – M(1) – N(10) | - | -0.558 |
| C(9) – N(1) – M(2) – N(2) | - | 1.146 |

Table S2. Quantum chemical parameters of the ligand L and Zn(II) complex.

| Molecular properties (ev) | Ligand (L) | [ZnL(Cl2)2] |
| --- | --- | --- |
| Etotal | -1963.5429 | -2154.448 |
| EHOMO | -5.2167 | -5.165034 |
| ELUMO | -0.8827 | -1.893927 |
| ∆EHOMO-LUMO | 4.3339 | 3.271106 |
| Ionisation potential (I) | 5.2167 | 5.164034 |
| Electron affinity (A) | 0.8827 | 1.893927 |
| Chemical hardness (η) | 2.1669 | 1.63555 |
| Absolute softness (σ) | 0.46149 | 0.61142 |
| Electronegativity (χ) | 3.0497 | 3.52948 |
| Chemical potential (µ) | -3.0497 | -3.52948 |
| Global softness (S) ev-1 | 0.2307 | 0.3057 |
| Electrophilicity index (ω) | 2.1460 | 3.80826 |
| Addition electronic charge (∆Nmax) | 1.4074 | 2.15798 |
| Dipole moment (Debye) | 1.9103 | 0.1091 |

Table S3.Antimicrobial activity MIC of Ni(II) and Zn(II) complexes.

| Compound | MIC (μg ml-1) | | |
| --- | --- | --- | --- |
| *S. aureus* | *P. aeruginosa* | *A. niger* |
| [NiL(H2O)4 (Cl2)2] | 125 | 62.5 | 31.25 |
| [ZnL(Cl2)2] | 62.5 | 62.5 | 62.5 |

Table S4. IC50 (mg/mL) values with DPPH method of ligand L and their metal complexes (**1**-**4**).

| Compounds | % Inhibition | | | | | IC50 |
| --- | --- | --- | --- | --- | --- | --- |
| 100 (μg/ml) | 200 (μg/ml) | 300 (μg/ml) | 400 (μg/ml) | 500 (μg/ml) |
| Ligand (L) | 58 | 60 | 62 | 63 | 65 | 38.23 |
| [CoL(H2O)4(Cl2)]·2H2O | 50 | 53 | 55 | 56 | 60 | 91.30 |
| [NiL(H2O)4 (Cl2)2] | 56 | 60 | 64 | 68 | 70 | 44.07 |
| [CuL(H2O)4(Cl2)]·H2O | 76 | 77 | 79 | 81 | 84 | 77.77 |
| [ZnL(Cl2)2] | 64 | 68 | 70 | 73 | 75 | 11.70 |
| Ascorbic acid | 52 | 62 | 72 | 76 | 80 | 37.14 |

Equation S1. Equations for total static dipole moment (μ) static polarizability (α) and static hyperpolarizability (βtot)


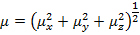


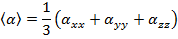


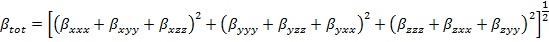


Equation S2. Equations for calculating quantum chemical parameters.

∆E = EHOMO - ELUMO  1

Ionisation potential I = - EHOMO 2

Electron affinity A = - ELUMO 3

Hardness η =
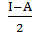
 4

Electronegativity χ =
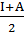
 5

Absolute softness σ =
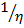
 6

Chemical potential μ = -χ 7

Softness S =
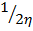
 8

Global electrophilicity index ω =
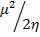
 9

Addition electronic charge ∆Nmax =
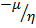
 10


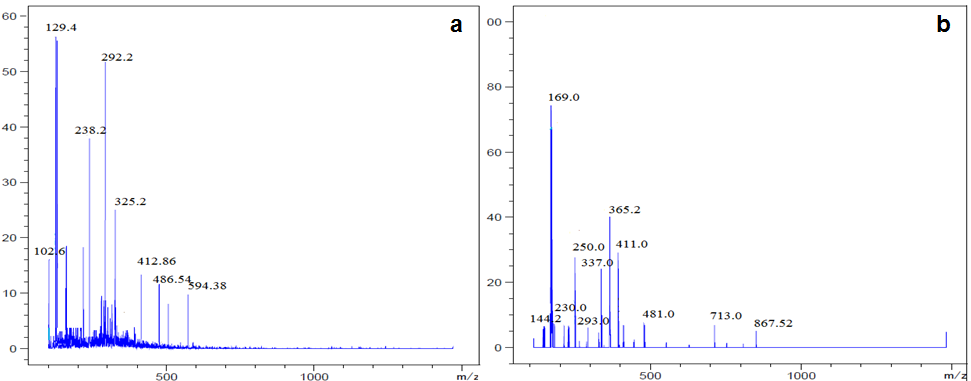


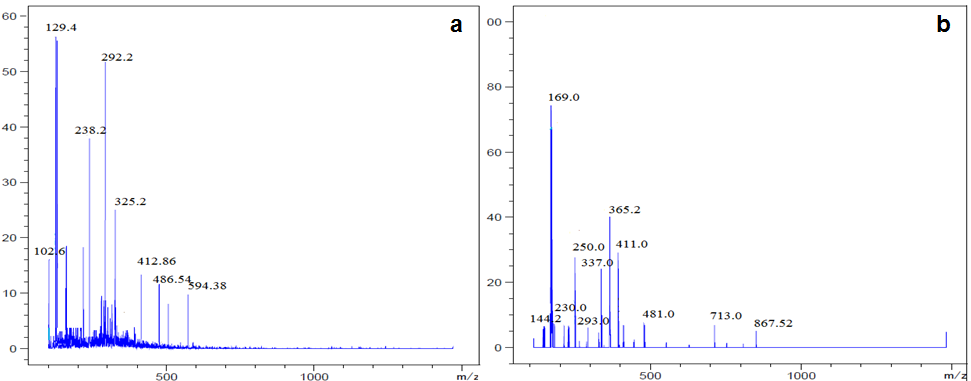


Figure S1. a) Mass spectra of Schiff base ligand. b) Mass spectra of Zn(II) complex.


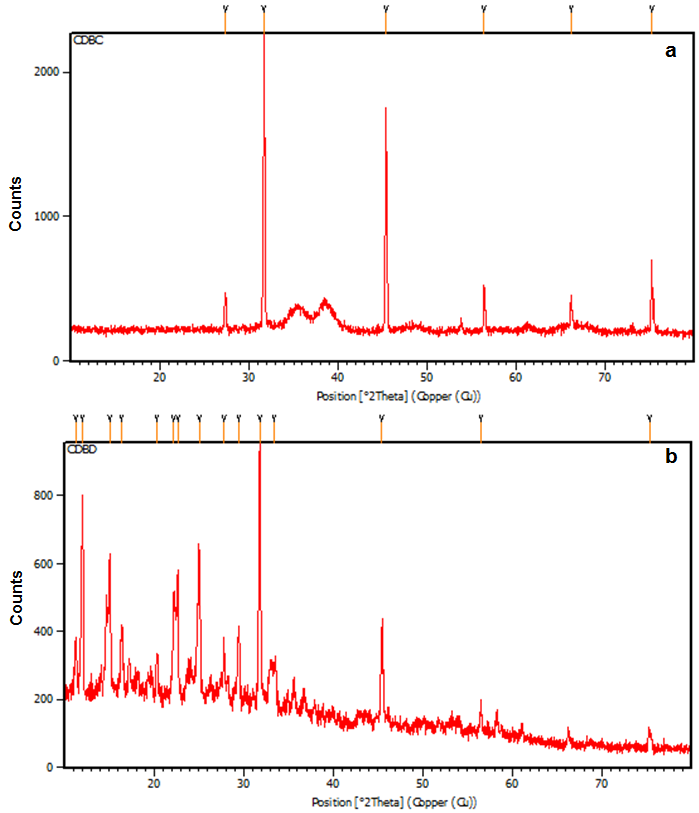


Figure S2. a) XRD pattern of Cu(II) complex. b) XRD pattern of Zn(II) complex.


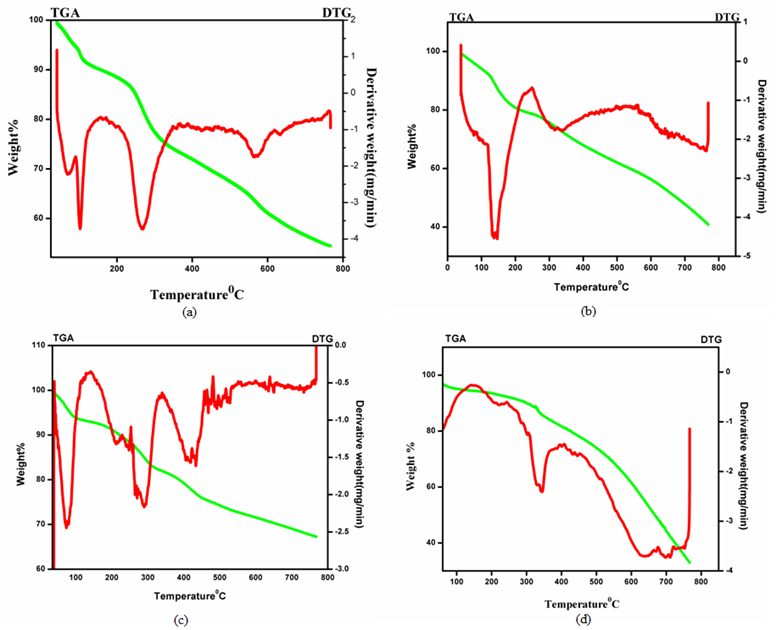


Figure S3.TG-DTG curves of Schiff base transition metal complexes.

Figure S4. Proposed geometry of the complexes.


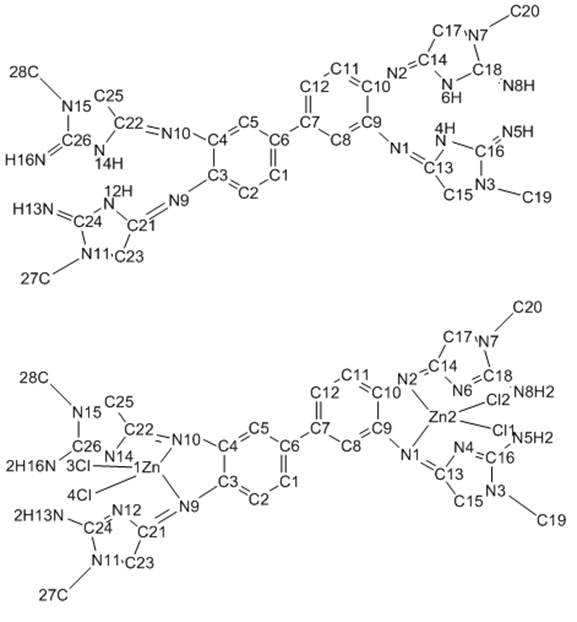


Figure S5. Atom numbering scheme.
